# Supplementary material
Source: Springer Nature journal article supplement (https://www.springermedizin.de/resource/supplementary/12899_2010_174_MOESM2_ESM.pdf/9514638)

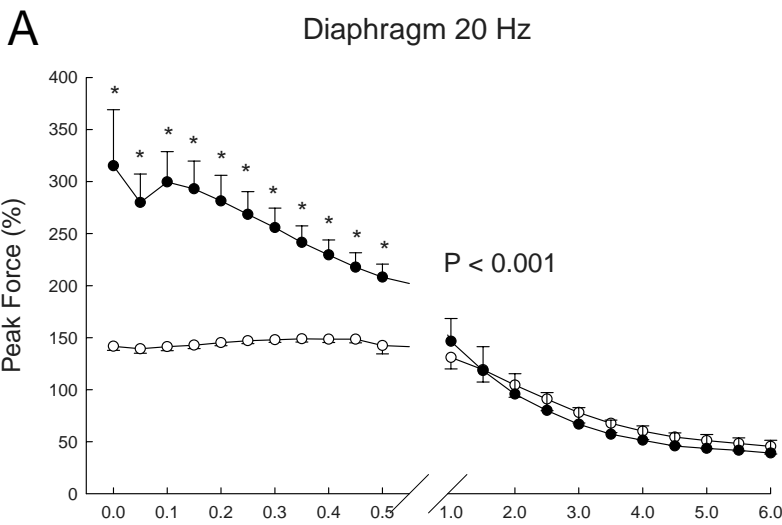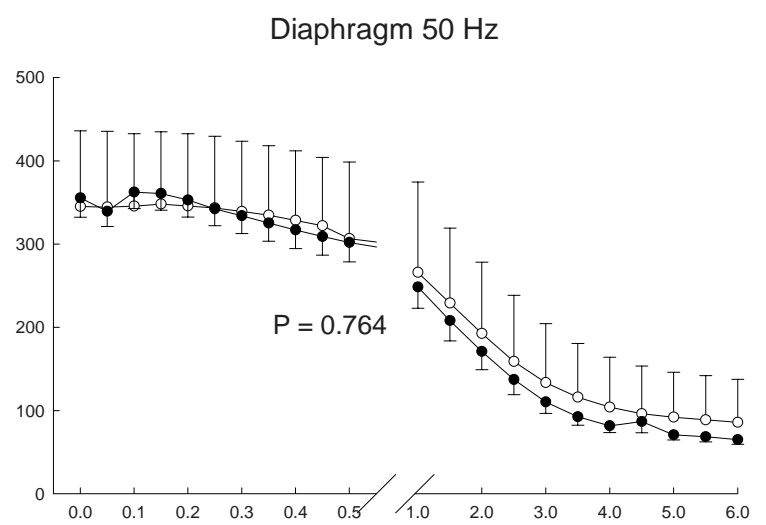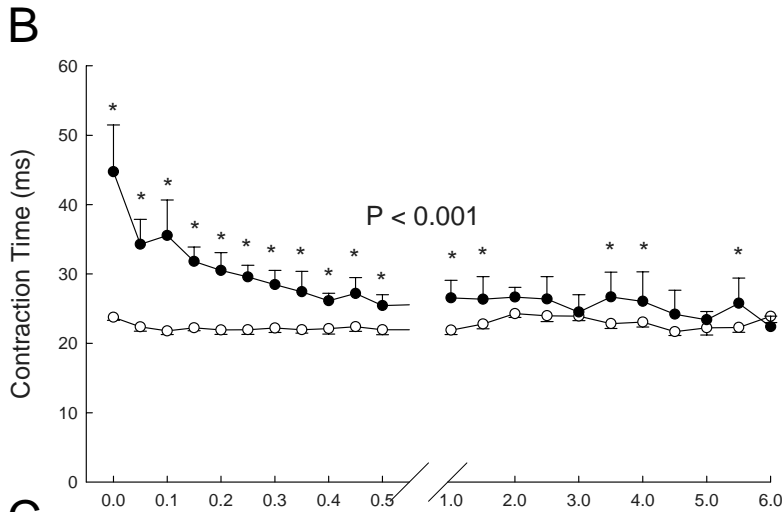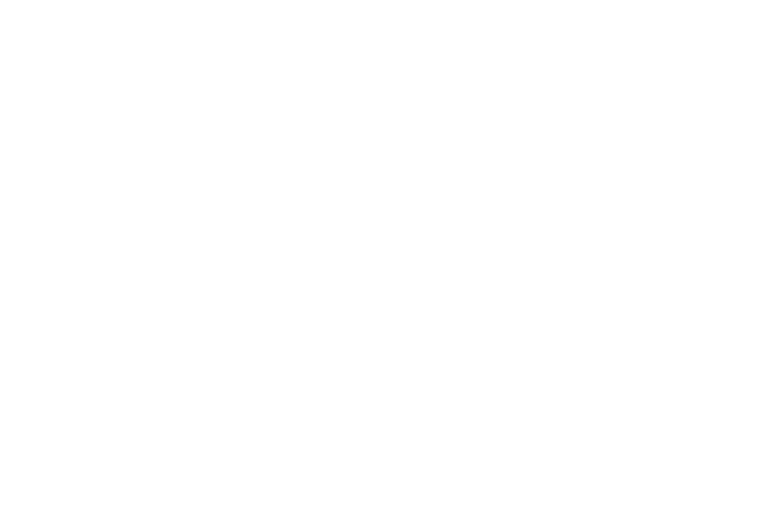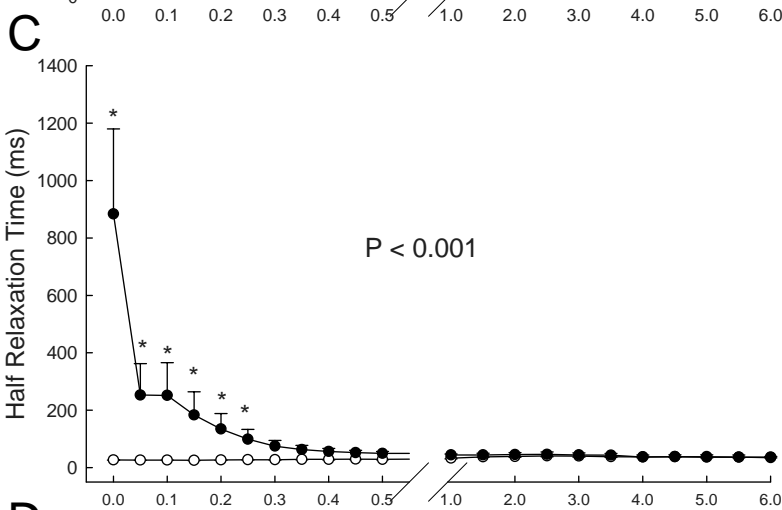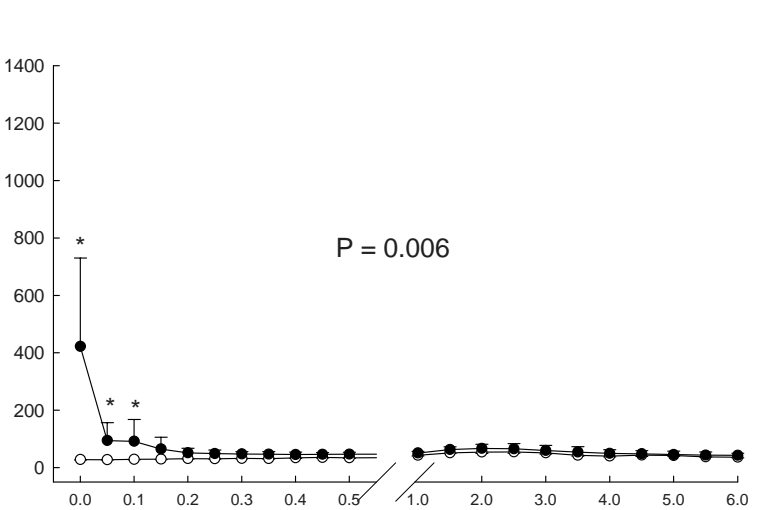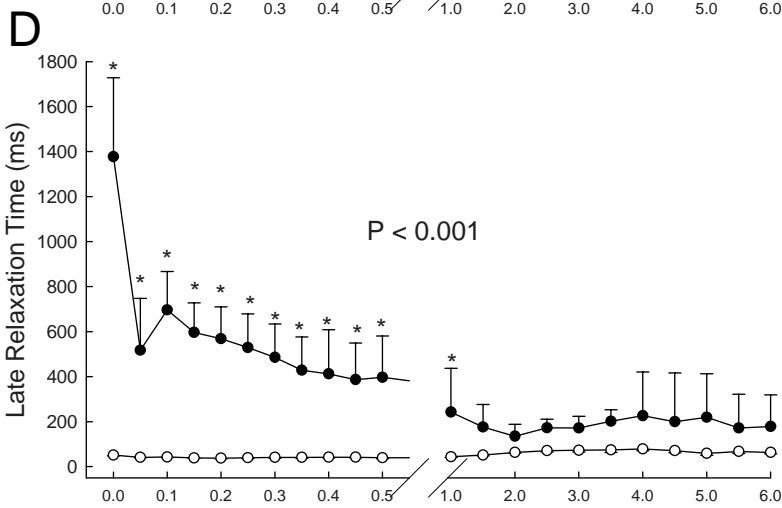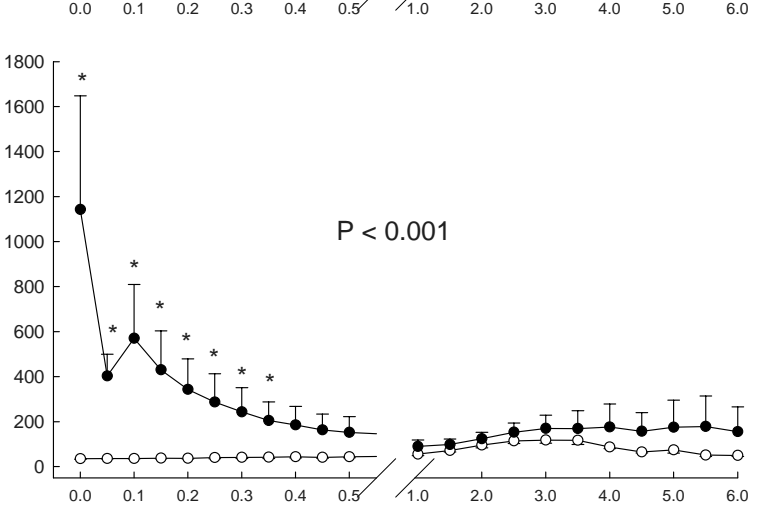

Time (min)

Supplement: MOESM2 [file 9514638]
